RESEARCH ARTICLE

# Gallic Acid Induces Necroptosis via TNF- $\alpha$ Signaling Pathway in Activated Hepatic Stellate Cells

Ya Ju Chang<sup>1</sup>, Shih Lan Hsu<sup>2</sup>, Yi Ting Liu<sup>3</sup>, Yu Hsuan Lin<sup>3</sup>, Ming Hui Lin<sup>3</sup>, Shu Jung Huang<sup>3</sup>, Ja-an Annie Ho<sup>1</sup>, Li-Chen Wu<sup>3\*</sup>

**1** Department of Biochemical Science and Technology, National Taiwan University, Taipei, Taiwan,

**2** Department of Education and Research, Taichung Veterans General Hospital, Taichung, Taiwan,

**3** Department of Applied Chemistry, National Chi Nan University, Puli, Taiwan

\* [lw25@ncnu.edu.tw](mailto:lw25@ncnu.edu.tw)

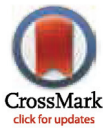

**OPEN ACCESS**

**Citation:** Chang YJ, Hsu SL, Liu YT, Lin YH, Lin MH, Huang SJ, et al. (2015) Gallic Acid Induces Necroptosis via TNF- $\alpha$  Signaling Pathway in Activated Hepatic Stellate Cells. *PLoS ONE* 10(3): e0120713. doi:10.1371/journal.pone.0120713

**Academic Editor:** Hiroyasu Nakano, Toho University School of Medicine, JAPAN

**Received:** November 11, 2014

**Accepted:** January 26, 2015

**Published:** March 27, 2015

**Copyright:** © 2015 Chang et al. This is an open access article distributed under the terms of the [Creative Commons Attribution License](https://creativecommons.org/licenses/by/4.0/), which permits unrestricted use, distribution, and reproduction in any medium, provided the original author and source are credited.

**Data Availability Statement:** All relevant data are within the paper and its Supporting Information files.

**Funding:** This study was supported by grants from the Taichung Veterans General Hospital (TCVGH)-National Chi Nan University (NCNU) 1027902, National Science Council of Taiwan (NSC) 101-2627-M-260-001, National Science Council of Taiwan (NSC) 101-2113-M-260-002-MY2, and Taichung Veterans General Hospital (TCVGH)-National Chi Nan University (NCNU)-1017901. National Chi Nan University, <http://www.ncnu.edu.tw/ncnuweb/>; Taichung Veterans General Hospital, <http://www.vghtc.gov.tw/home/index.html>; National Science

## Abstract

Gallic acid (3, 4, 5-trihydroxybenzoic acid, GA), a natural phenolic acid widely found in gall-nuts, tea leaves and various fruits, possesses several bioactivities against inflammation, oxidation, and carcinogenicity. The beneficial effect of GA on the reduction of animal hepatofibrosis has been indicated due to its antioxidative property. However, the cytotoxicity of GA autoxidation causing cell death has also been reported. Herein, we postulated that GA might target activated hepatic stellate cells (aHSCs), the cell type responsible for hepatofibrosis, to mitigate the process of fibrosis. The molecular cytotoxic mechanisms that GA exerted on aHSCs were then analyzed. The results indicated that GA elicited aHSC programmed cell death through TNF- $\alpha$ -mediated necroptosis. GA induced significant oxidative stress through the suppression of catalase activity and the depletion of glutathione (GSH). Elevated oxidative stress triggered the production of TNF- $\alpha$  facilitating the undergoing of necroptosis through the up-regulation of key necroptotic regulatory proteins TRADD and receptor-interacting protein 3 (RIP3), and the inactivation of caspase-8. Calmodulin and calpain-1 activation were engaged, which promoted subsequent lysosomal membrane permeabilization (LMP). The TNF- $\alpha$  antagonist (SPD-304) and the RIP1 inhibitor (necrostatin-1, Nec-1) confirmed GA-induced TNFR1-mediated necroptosis. The inhibition of RIP1 by Nec-1 diverted the cell death from necroptosis to apoptosis, as the activation of caspase 3 and the increase of cytochrome c. Collectively, this is the first report indicating that GA induces TNF signaling-triggered necroptosis in aHSCs, which may offer an alternative strategy for the amelioration of liver fibrosis.

## Introduction

Gallic acid (3,4,5-trihydroxy benzoic acid, GA), a natural antioxidant, reportedly undergoes a two-step, one-electron transfer autoxidation to generate GA radicals [1]. The oxidation of GA reportedly initiates at the para-hydroxyl site of a benzene ring to generate semiquinone free

Council Taiwan, <http://www.most.gov.tw/>. The funders had no role in study design, data collection and analysis, decision to publish, or preparation of the manuscript.

**Competing Interests:** The authors have declared that no competing interests exist.

radicals, followed by the generation of dehydro-propyl gallate and quinone [2]. Reactive oxygen species (ROS), such as  $\bullet\text{O}_2^-$ ,  $\bullet\text{OH}$  and  $\text{H}_2\text{O}_2$  are concomitantly produced and result in oxidative stress, which can induce cytotoxic activity [3–6]. Cell death caused by GA, such as apoptosis, has been addressed in several cell types, including melanoma, renal, and oral squamous carcinoma cell lines, vascular smooth muscle cells, lung fibroblasts, and leukemia cells [3,7–13]. It is likely that oxidative stress induced by GA autoxidation is a key factor that can cause cell death [6]. However, GA has also been reported to ameliorate hepatic disorders through its antioxidative activity and hepatoprotective effects [14]. Thus, GA may critically maneuver its anti—and pro—oxidative capacity in hepatic malfunctions. Additionally, promoted cell death and the inactivation of activated hepatic stellate cells (aHSCs) during the resolution of acute or chronic injury partially explain the attenuation of fibrogenesis [15]. Accordingly, we postulated that GA could regulate aHSCs to attenuate hepatofibrosis through its anti—and pro—oxidative effects.

Hepatic stellate cells—previously called Ito cells, fat-storing cells or lipocytes—play a central role in hepatic fibrosis [16]. HSCs situate at the space of Disse (or perisinusoidal space) between hepatocytes and sinusoids. HSCs mainly function as storage for vitamin A, a mediator of portal venous pressure and hepatic blood flow, and a regulator of retinoid-related homeostasis in their quiescent state. The activation of HSCs caused by oxidative stress may result in hepatic fibrosis, which can be essentially divided into three stages [17]: the initiation, perpetuation, and resolution. Factors such as tumor necrosis factor- $\alpha$  (TNF- $\alpha$ ), interleukins, fibronectin, transforming growth factor (TGF- $\beta$ 1), and platelet-derived growth factor (PDGF) secreted by Kupffer cells, hepatocytes, leukocytes, and sinusoidal endothelial cells initiate stellate cell activation [18,19]. Autocrine and paracrine loops subsequently serve to perpetuate activation in the aspects of proliferation, chemotaxis, fibrogenesis, contractility, matrix degradation, and retinoid degradation. Once activated, aHSCs perform phenotypic and morphologic changes (myofibroblast-like) and are susceptible to proliferative mediators and inflammatory cytokines [17]. In addition, these cells no longer store retinoid; instead, they produce type I collagen, matrix metalloproteinase (MMP; for extracellular matrix degradation),  $\alpha$ -smooth muscle actin (for facilitation of migration), and cytokines to promote fibrogenesis [16,19].

It is noteworthy that the antioxidative system of HSCs during activation varies significantly. Catalase, an antioxidant that catalyzes the degradation of extra/intra-cellular hydrogen peroxide and plays a key role in protecting cells against ROS, shows a restrained expression profile in hepatocellular carcinoma [20] and probably in hepatic stellate cell transformation partially due to the increase of catalase gene methylation [21] and the binding of negative regulators to the silencer elements [22,23]. Accordingly, accumulated oxidative stress resulting from GA autoxidation could lead to cytotoxicity, intracellular  $\text{Ca}^{2+}$  elevation and oxidative stress-induced apoptosis [24].

Recently, a type of programmed cell death, necroptosis, has been identified [25,26]. Necroptosis, similar to apoptosis, involves defined cell signaling that leads to cell death upon stimulation by ligands such as TNF- $\alpha$ , FasL, and TRAIL. The kinase activities of receptor-interacting protein kinase 1 (RIP1) and RIP3 play central roles in TNF- $\alpha$ -induced programmed necrosis. The signaling mechanisms induced by TNF- $\alpha$  mediate the activation of NF $\kappa$ B and apoptosis through the formation of two protein complexes, I and IIa, respectively, under apoptosis-competent condition. After TNF- $\alpha$  interacting with the TNF receptor (TNFR1), the active TNF- $\alpha$  trimer complex initiates the recruitment of protein molecules such as tumor necrosis factor receptor type 1-associated death domain (TRADD), RIP1, CYLD and several other elements to assemble a complex (complex I). Once dissociated from TNFR1, RIP1 constitutes complex IIa with Fas-associated death domain (FADD) and caspase-8 for the processing of apoptosis. However, under apoptosis-deficient conditions, RIP1 may interact with RIP3 through the RIP

homotypic interaction motif (RHIM) domains to form a functional amyloid signaling complex IIb (necrosome) to undergo necroptosis. Additionally, the induction of ROS and calcium-induced lysosomal membrane permeabilization (LMP) through calpain activation has been suggested to critically participate in the execution of programmed necrosis to disrupt cell integrity [26,27].

Herein, we investigated the cytotoxic effect of GA on aHSCs and the underlying molecular mechanisms. Results indicated that GA induced oxidative stress in aHSCs through the inhibition of catalase activity and the promotion of intracellular ROS, lipid peroxides, and oxidative DNA levels. These stresses in turn upregulated the expression of TNF- $\alpha$ , reduced the content of intracellular GSH, and blocked the activation of caspase-8 leading to the initiation of necroptosis characterized by the upregulation of TRADD and RIP3, and the engagement of lysosomal membrane permeabilization modulated by elevated intracellular calcium levels and the activation of calmodulin and calpain 1. In addition, GA-induced necroptosis can be diverted to apoptosis by inhibition of RIP1 activity. These results may offer an alternative strategy for the amelioration of hepatic fibrosis.

## Materials and Methods

### Primary hepatic and hepatic stellate cells isolation and culture

Primary hepatic cells (HCs) and hepatic stellate cells (HSCs) were prepared from Sprague Dawley rat liver as described by Seglen [28] and Kawada et al. [29], respectively. This study was carried out in strict accordance with the recommendations in the Guide for the Care and Use of Laboratory Animals of Taiwan Animal Protect Act. The protocol was approved by the Committee on the Ethics of Animal Experiments of National Chi Nan University (Permit Number: 950102). Carbon dioxide was used for euthanasia, and all efforts were made to minimize suffering. Briefly, the liver was perfused, digested with pronase and collagenase, for 15 min at 37°C at a flow rate of 20 ml/min. and then excised. After further digestion with pronase and collagenase, the resulting suspension was filtered and centrifuged 460 $\times$ g on a 11% (v/v) Nycodenz cushion (Sigma, St. Louis, MO, USA) to isolate HSCs in the upper whitish stellate cell-enriched layer. Resuspended pellets were cultured in DMEM supplemented with 10% FBS and antibiotics (70 mg L<sup>-1</sup> penicillin and 100 mg L<sup>-1</sup> streptomycin) at 37°C with a humidified atmosphere of 5% CO<sub>2</sub>. HSCs were activated for 6 passages and used throughout the study. For hepatic cells, after perfusion with collagenase, the liver was excised and dispersed cells in L-15/BSA, followed by sedimentation at unit gravity for 20 min. The supernatant cell suspension was filtered through gauze. The filtrate was washed twice with HBS by centrifugation at 50 $\times$ g for 45 s to remove debris, damaged cells, and non-parenchymal cells. Before seeding, cells were washed once with the culture medium. The range of cell yields was from 4 $\times$ 10<sup>8</sup> to 6 $\times$ 10<sup>8</sup> with a survival rate of approximately 95%.

### Cell viability assay

Cell viability was determined by MTT (3-(4,5-Dimethylthiazol-2-yl)-2,5-Diphenyltetrazolium Bromide) assay. Briefly, activated HSCs (aHSCs) were initially plated at a density of 1 $\times$ 10<sup>4</sup> cells per well in 96-well plates for 24 hrs. The cells were then incubated with designated concentrations of GA and GA analogous (S1 Fig.) for 24 hrs at 37°C. MTT (10  $\mu$ L, 0.5 g/L) solution was then added to each culture well and incubated for another 4 hrs at 37°C. The MTT-formazan crystals produced by viable cells were dissolved by DMSO. The absorbance at 570 nm was monitored with a microplate reader (Bio-Rad, CA, USA). All experiments were performed in triplicate, and the results of treated cells were shown in percentage of untreated control cells.

## Cell proliferation assay

Cells cultured in serum-free DMEM were plated into 96-multiwell plates (5000 cells/well). After incubation for 24 hrs, cells were treated with GA of 0, 25, 50 75  $\mu$ M. Cell proliferation was measured by using the BrdU cell proliferation assay kit as manufacturer's instructions (Cell Signaling Technology, Denvers MA). The incorporation of the pyrimidine analogue 5-bromo-2'-deoxyuridine during DNA synthesis in proliferating cells was monitored at 370 nm. All experiments were performed in triplicate, and the results of treated cells were shown in percentage of untreated control cells.

## Cell cycle analysis

At the end of incubation (24 hrs) with GA, the activated HSCs were washed twice with PBS, collected with 0.25% trypsin-EDTA, fixed with ice-cold alcohol (1 mL 75% (v/v)) for 12 hrs at  $-20^{\circ}\text{C}$ , and then centrifuged at  $380\times g$  for 5 min at room temperature. Cell pellets were treated with 1 mL of cold staining solution containing 20  $\mu\text{g}/\text{mL}$  of propidium iodide (PI) and 20  $\mu\text{g}/\text{mL}$  of RNase A, and incubated for 15 min in darkness at room temperature. The samples were analyzed by FACSCalibur system (BD Biosciences, Franklin Lakes, NJ, USA) using Cell-Quest software. Data are representative of at least three independent experiments.

## Lactate dehydrogenase (LDH) release assay

The activity of lactate dehydrogenase (LDH) was measured colorimetrically by LDH assay kit as manufacturer's instructions (Abcam, Cambridge, UK). Briefly, aHSCs were incubated with designated concentrations of GA for 24 hrs at  $37^{\circ}\text{C}$ . The activity of LDH in culture medium was measured spectrophotometrically recording the rate of change in NADH concentration at a wavelength of 450 nm after interaction with a dye. A NADH calibration curve was constructed to determine LDH activity. One unit of LDH refers to the catalyzation of the conversion of lactate to pyruvate to generate 1.0  $\mu\text{mol}$  NADH per min at  $37^{\circ}\text{C}$ .

## Analysis of reactive oxygen species (ROS) and hydrogen peroxide

ROS was determined using a commercial DCFDA-cellular ROS detection assay kit as manufacturer's instructions (Abcam, Cambridge, UK). Briefly, aHSCs were plated on a 96-well plate ( $2.5\times 10^4$  cells/well). After overnight attachment, cells were treated with GA at designated concentration for 6 hrs, followed by staining with cell permeant reagent, 2',7'-dichlorofluorescein diacetate (DCFDA) for 45 min at  $37^{\circ}\text{C}$ . Deacetylated DCFDA were fluorescently determined after oxidized by ROS to form 2',7'-dichlorofluorescein (DCF) with Ex 495 nm /Em 529 nm. Culture medium and intracellular hydrogen peroxide ( $\text{H}_2\text{O}_2$ ) of aHSCs were analyzed by using a fluorometric hydrogen peroxide kit as manufacturer's instructions (Cayman, Ann Arbor, MI). The assay is based on the conversion of 10-Acetyl-3,7-dihydroxyphenoxazine (ADHP) to highly fluorescent resorufin in the presence of horseradish peroxidase (HRP) and  $\text{H}_2\text{O}_2$ . The fluorescence of resorufin was read at Ex 530 nm/Em 590 nm. All experiments were performed in triplicate, and the results of treated cells were shown in percentage of untreated control cells after background subtraction.

## Detection of DNA oxidative damage

The detection of DNA oxidative damage was determined by the DNA Damage EIA kit (Cayman, USA) using Anti-8-OHdG monoclonal antibody to competitively bind 8-OHdG. The immune complexes (anti-8-OHdG and free 8-OHdG) were washed away, while antibodies that

caught by immobilized 8-OHdG were detected by a horseradish peroxidase (HRP) conjugated secondary antibody, and the absorbance was measured at 415 nm.

### Detection of intracellular glutathione

The concentration of glutathione and oxidized glutathione (GSH/GSSG) was determined by glutathione assay kit as manufacturer's instructions (Cayman, Ann Arbor, MI, USA). The cell pellet is homogenized in cold phosphate buffer (50 mM, pH 6–7, 1 mM EDTA). The supernatant of the homogenates (10000×g for 15 min) was used to determine GSH/GSSG by an enzymatic recycling method. The protein concentration was determined by the Bradford method.

### Analyses of lipid peroxidation

Intracellular lipid peroxidation of aHSCs was fluorescently (ex. 515 nm; em. 553 nm) measured by the determination of the MDA–TBA complex with fluorometer (Thermo Scientific) using HPLC with LiChrospher column (RP-18, 5µm, Merck), mobile phase of 25 mM Na<sub>2</sub>HPO<sub>4</sub>–methanol (58/42, v/v) at a flow rate of 1 ml/min. The complex of MDA–TBA was eluted in 4.8 min. A MDA–TBA complex standard curve was constructed for calibration. Additionally, the lipid peroxidation (LPO) assays were performed using a Lipid Hydroperoxide Assay kit (Cayman Chemical). Lipid hydroperoxides were extracted into chloroform and measured by the redox reactions with ferrous ions. Chromogenic reaction was performed at room temperature for 5 min, followed by reading the mixture at 500 nm. The calibration curve was constructed using 13-Hydroperoxy-octadecadienoic acid. Lipid hydroperoxide was expressed as nmol/mg protein.

### Catalase assay

The activity of catalase (CAT) was determined by catalase assay kit as manufacturer's instructions (Cayman, Ann Arbor, MI, USA). The peroxidatic function of CAT was used for activity evaluation. Cell lysates were incubated with assay buffer, methanol, and H<sub>2</sub>O<sub>2</sub> for 20 min at room temperature in dark. Potassium hydroxide was utilized to terminate the reaction, followed by the addition of 4-amino-3-hydrazino-5-mercapto-1,2,4-triazole (Purpald) as chromogen to interact with the produced formaldehyde for 10 min. The reaction mixture was measured spectrophotometrically at 540 nm. CAT activity was expressed as nmol/min/mL. All experiments were performed in triplicate, and the results of treated cells were shown in percentage of untreated control cells.

### Catalase transfection

Transfection was performed using Lipofectamine 2000 (Invitrogen, Carlsbad, CA, USA) as manufacturer's instructions. The plasmid containing the encoded sequence for catalase expression (pcDNA3, Invitrogen, USA) was amplified in competent cells (Invitrogen, Grand Island, USA). Plasmids and Lipofectamine were mixed in Reduced Serum Medium (Invitrogen), and incubated for 20 min at room temperature. For internal control, cells were transfected with empty pcDNA vector.

### Immunoblotting analysis

Cells were lysed by RIPA buffer (50 mmol/L Tris-HCl, pH 7.4; 150 mmol/L NaCl; 1% (v/v) NP-40; 5 mmol/L EDTA; 1 mmol/L DTT; 0.5% sodium deoxycholate; 0.1% SDS; 1 mmol/L Na<sub>3</sub>VO<sub>4</sub>; and 1 mmol/L PMSF) and centrifuged at 12,000×g for 30 min at 4°C. Supernatant proteins were determined by Bradford method using BSA as standard and measured at 595



nm. After SDS page separation, proteins were transferred onto a PVDF membrane and revealed by ECL detection reagents. Primary antibodies used in the study included TNF- $\alpha$ , TRADD,  $\beta$ -actin, CaM, cytochrome C, calmodulin from Cell signaling technology (Denver, MA, USA); caspase 8 were from Millipore (Billerica, MA, USA); RIP3 and calpain1 were from Biovision (Milpitas, CA, USA); caspase 3 and were from Abcam (Cambridge, UK).

### Determination of lysosomal membrane permeabilization (LMP)

The aHSCs lysosomal membrane stability was determined by the redistribution of the fluorescent dye, acridine orange [30]. After staining, cells were washed twice with fresh medium at 50  $\times g$  for 5 min. to remove excess dye, followed by fluorometrically monitored at Ex495 nm/Em 530 nm by an Olympus IK71 fluorescent microscope (Olympus, Tokyo, Japan). Lysosomal membrane leakiness was determined as cytosolic green fluorescence induced by acridine orange released from lysosomes.

### Calcium assay

The concentration of intracellular  $\text{Ca}^{2+}$  was measured by calcium assay kit (Cayman, Ann Arbor, MI, USA) as manufacturer's instructions. The assay is based on the formation of o-cresolphthalein-calcium in alkaline condition, and the produced purple complexes were monitored at absorbance of 575 nm.

### Statistic

The data has been analyzed by Sigma plot version 9.0. Results are presented as mean $\pm$ SD for individual experiments. Statistical differences (experiment vs. control) were calculated by student's *t*-test and  $P < 0.05$  was considered as statistically significant.

## Results

### Gallic acid induces oxidative stress leading to significant cytotoxic and antiproliferative effects on aHSCs

GA and its analogues with different resonance states that may cause distinct levels of oxidative stress were used to explore GA-induced cytotoxic and antiproliferative effects on aHSCs. The results of the MTT assay indicated that GA and analogues such as pyrogallol (P) and 5-Hydroxydopamine hydrochloride (H) demonstrated dose-dependent cytotoxic effects (25, 50, and 75  $\mu\text{M}$ ) on aHSCs after 24 hrs incubation (Fig. 1A), with an  $\text{EC}_{50}$  value of 30.5 $\pm$ 1.7, 41.8 $\pm$ 1.6, and 35.0 $\pm$ 1.0  $\mu\text{M}$ , respectively, while other analogues did not. GA also held significant antiproliferative effects ( $P < 0.05$ ) on aHSCs as determined by analyzing the newly synthesized DNA of dividing cells through the BrdU assay. A dose-dependent reduction (55.3 $\pm$ 2.3 and 66.9 $\pm$ 8.4%) in cell proliferation was observed after 24 hrs incubation at GA concentrations of 50 and 75  $\mu\text{M}$ , respectively (Fig. 1B). Notably, in contrast to aHSCs GA showed less cytotoxicity on quiescent HSCs (qHSCs) and no cytotoxicity on normal hepatocytes at GA concentrations of 25, 50, and 75  $\mu\text{M}$  after 24 hrs of incubation (Fig. 1C). The cell viability of qHSCs was almost 10 times higher than that of aHSCs (73.4% vs. 7.9%) at GA 75 $\mu\text{M}$  after 24 hrs of incubation (S2 Fig.).

Oxidative stress induced by GA and GA analogues was further investigated by analyzing ROS formation. The levels of hydrogen peroxide ( $\text{H}_2\text{O}_2$ ) in aHSC culture medium was determined after treatment with GA and GA analogues at 25, 50, and 75  $\mu\text{M}$ . Increased levels of  $\text{H}_2\text{O}_2$  were found in the GA, P, and H treated groups (Fig. 2A). GA also elevated intracellular content of  $\text{H}_2\text{O}_2$  (Fig. 2B). Accumulated intracellular ROS (e.g. hydroxyl and peroxy radicals)

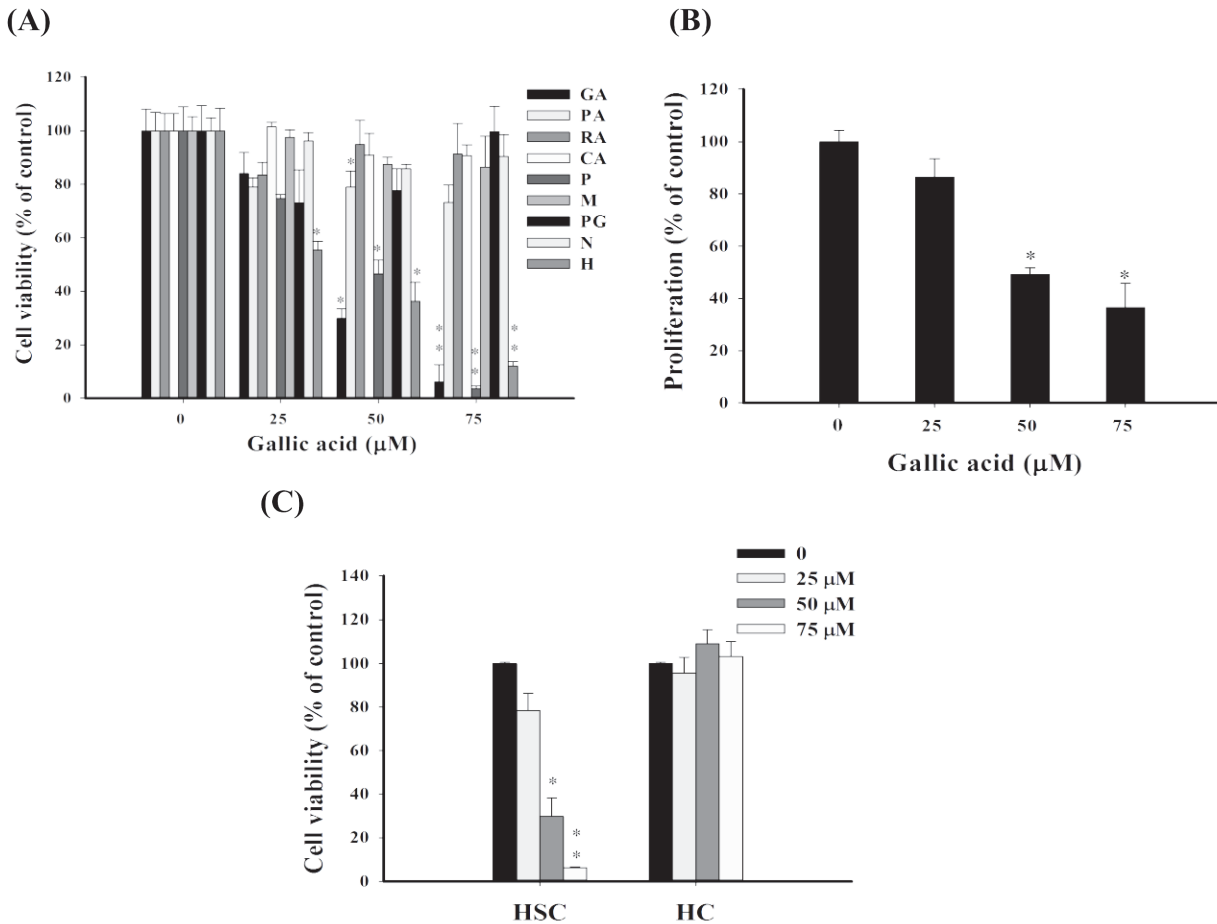

**Fig 1. GA induces cytotoxic and anti-proliferative effects on aHSCs.** (A) Cell viability was monitored by using an MTT assay. GA analogues were treated with various concentrations (0, 25, 50, 75 μM) for 24 hrs. Gallic acid (GA); 2,3,4-Trihydroxybenzoic acid (TA); Protocatechuic acid (PA); α-Resorcylic acid (RA); 3,4-Cresotic acid (CA); Methyl-3,4,5-trihydroxybenzoate (M); Propyl gallate (PG); 4-Nitrocatechol (N); 5-Hydroxydopamine hydrochloride (H). (B) Cell proliferation was examined by using a BrdU assay. GA-treated cells demonstrated significant cell proliferative inhibitory effects compared to the control groups. (C) The cytotoxic effects of GA on aHSCs and hepatocytes (HC). Various concentrations of GA (0, 25, 50, and 75 μM) were added to hepatocytes and aHSCs. The cell viability was measured by an MTT assay. Data were expressed as mean±SD from three different experiments. The asterisk (\*) indicates a significant difference from control group (\*  $P < 0.05$ , \*\*  $P < 0.01$ ).

doi:10.1371/journal.pone.0120713.g001

determined by DCFDA cellular ROS detection assay was also observed in the GA, P, and H treated groups (Fig. 2C). In addition, GA-induced lipid peroxidation, and oxidative DNA in aHSCs were revealed, as evidenced by dose-dependent formation of MDA (Fig. 2D), lipid hydroperoxides (Fig. 2E), and 8-oxodG, (Fig. 2F), respectively. Intracellular GSH concentration was also decreased with the increase of GA (Fig. 2G). These results suggest that GA induces remarkable oxidative stress in aHSCs. Besides, GA analogues like P and H generated significant amount of ROS intracellularly and in culture medium, and induced remarkable cytotoxicity, whereas other analogues induced no or lower levels of ROS and cytotoxicity (Fig. 1A). These outcomes might suggest that the involvement of oxidative stress in cell demise was chemical structure specific. Moreover, significant cytotoxicity was observed in aHSCs but not in normal hepatocytes after the treatment of GA, which could be due to the decreased antioxidative activity in aHSCs [19].

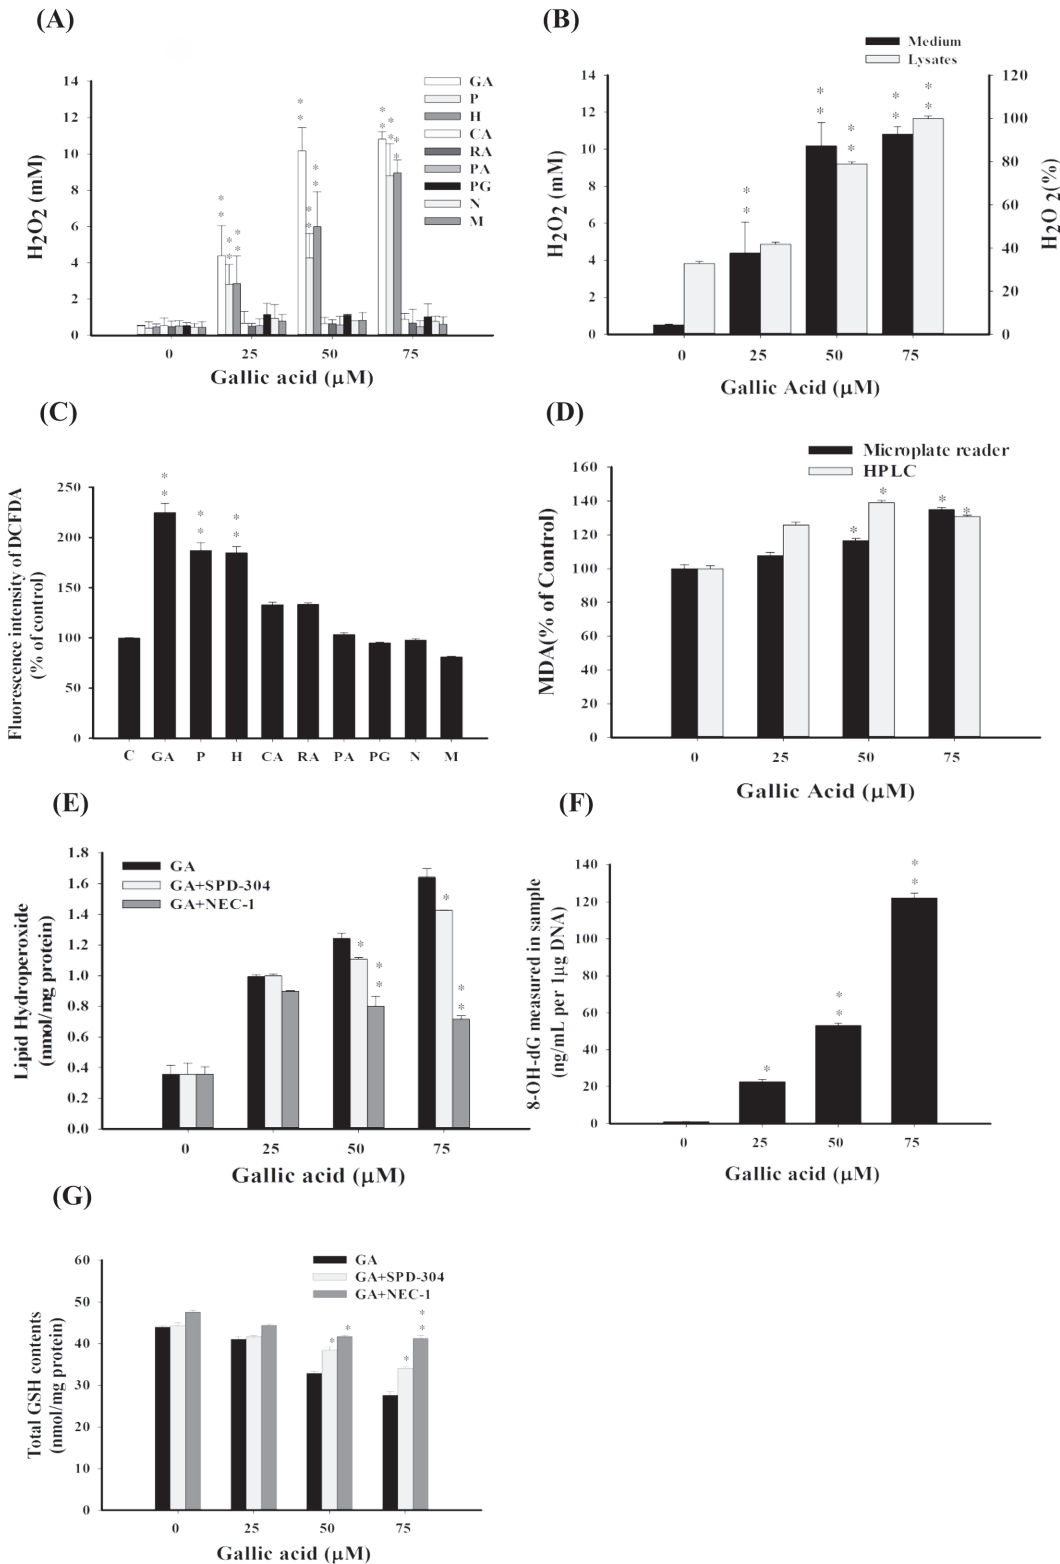

**Fig 2. GA induces the formation of  $\text{H}_2\text{O}_2$ , ROS, DNA oxidation, and lipid peroxidation in aHSCs.** (A) Induction of hydrogen peroxide by GA and GA analogues (0, 25, 50, and 75  $\mu\text{M}$ ). (B) GA dose-dependently (0, 25, 50, and 75  $\mu\text{M}$ ) increased the production of  $\text{H}_2\text{O}_2$  both in the culture medium and the cytosol. (C) GA-induced ROS, was determined by DCFDA cellular ROS detection assay. GA and analogues GA (50  $\mu\text{M}$ ) were treated with aHSCs; the generation of DCF was measured fluorescently. (D) GA-induced lipid peroxidation products, malondialdehyde (MDA), were determined by HPLC or



microplate reader after 24 hrs of incubation. (E) Lipid peroxidation products, lipid hydroperoxides, were determined with or without inhibitors of TNF- $\alpha$  and RIP1, SPD-304 (2 $\mu$ M) and Nec-1 (2 $\mu$ g/mL), respectively. (F) Oxidized DNA (8-OH-dG), and (G) total GSH contents were determined. Data were expressed as mean $\pm$ SD from three different experiments. The asterisk (\*) indicates a significant difference from control group (\* $P$ <0.05, \*\* $P$ <0.01).

doi:10.1371/journal.pone.0120713.g002

### Gallic acid suppresses the catalase activity of aHSC leading to the accumulation of H<sub>2</sub>O<sub>2</sub>

The accumulation of GA-induced H<sub>2</sub>O<sub>2</sub> in aHSCs could be resulted from impaired intracellular antioxidant system. To further investigate this assumption, the effect of antioxidant system on cell survivability was then determined (Fig. 3). Reagents such as deferoxamine (DFX) (a ferric iron chelator to limit Fenton-like reaction), superoxide dismutase (SOD), and catalase (CAT) were used to reduce oxidative stress. DFX chelates ferric iron to retard Fenton's reaction and the subsequent radical generation. SOD catalyzes the dismutation of superoxide to oxygen and hydrogen peroxide. Catalase catalyzes the decomposition of hydrogen peroxide to water and oxygen. Activated HSCs were initially incubated with GA, followed by the addition of

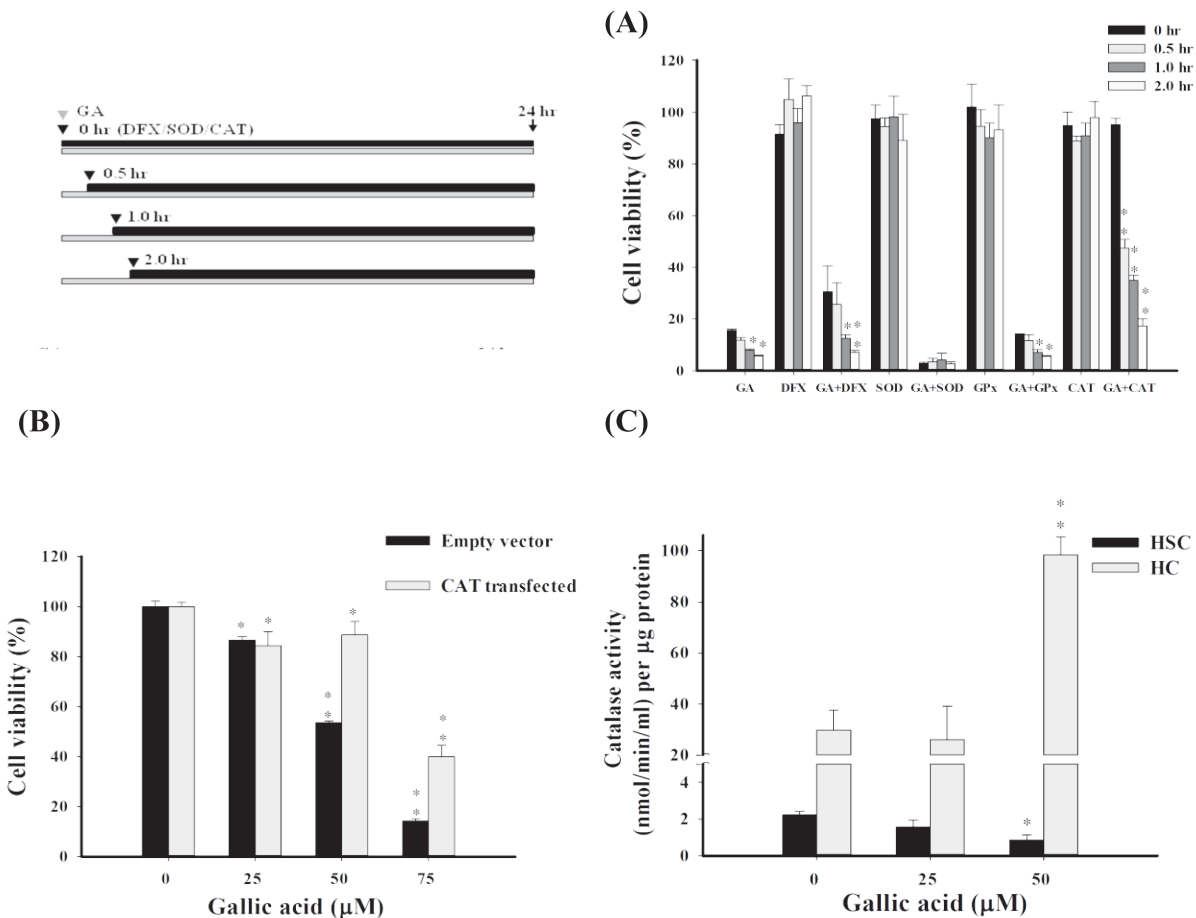

**Fig 3. GA down-regulates the activity of catalase in aHSCs.** (A) The effect of antioxidants on the aHSC mortality rate. Activated HSCs were pre-treated with 75  $\mu$ M of GA for 24 hrs, followed by treatments with DFX (100 $\mu$ M), SOD (100 U/mL), and CAT (100 U/mL) at different time intervals (0, 0.5, 1, and 2 hrs) after GA treatment. The cell viability was determined by an MTT assay. (B) The effect of catalase activity on viability in GA treated aHSCs. The aHSCs were transfected with catalase genes and incubated with GA for 24 hrs, followed by measurement of the cell survivability by MTT assay. (C) GA inhibits the activity of catalase in aHSCs but not in hepatocytes. Cells were treated with GA (0, 25, and 50  $\mu$ M) for 24 hrs before the measurement of catalase activity. \*  $P$ <0.05, \*\* $P$ <0.01.

doi:10.1371/journal.pone.0120713.g003

antioxidants at different time intervals (0, 0.5, 1, and 2 hrs) after GA treatment. After 24 hrs of incubation, the cell viability was determined. [Fig. 3A](#) indicates that group treated with catalase showed the greatest cell survival promoting effect compared to other antioxidants. Group treated with DFX showed reduced cytotoxic effect in the first two time periods (0 and 0.5 hr) presumably due to the suppression of hydroxyl radical production catalyzed by iron. However, at the late time period (1 and 2 hrs), the cytotoxicity of DFX and GA co-treatment group was similar to that of GA alone, suggesting the critical role of  $H_2O_2$  in cytotoxicity. There were significant cytotoxicity and no rescuing effect observed in the groups treated with SOD probably because of the accumulation of  $H_2O_2$  resulted by the catalyzation of superoxides. On the other hand, cell survival was significantly promoted in groups treated with catalase, indicating the involvement of  $H_2O_2$  in cytotoxicity.

Improved survivability of aHSCs at several levels of GA treatment (25, 50, and 75  $\mu M$ ) was maintained by transducing the catalase genes ([Fig. 3B](#)). A significant 35.1% and 25.7% recovery ( $P < 0.05$ ) at GA concentrations of 50 and 75  $\mu M$ , respectively, was achieved. Furthermore, the inhibitory potency of GA on the catalase activity was studied. As displayed in [Fig. 3C](#), hepatocytes possess higher catalase activity than that of aHSCs under normal conditions. With the addition of GA (25 and 50  $\mu M$ ), the catalase activity of aHSCs was suppressed dose-dependently, whereas the activity of hepatocytes was promoted at higher GA concentrations. These findings suggest that catalase is critical to the survival of aHSCs insulted by GA-induced oxidative stress. It has been reported that restricted catalase activity shows in HSCs once being activated [[31](#)]. This could likely make aHSCs more vulnerable to oxidative stress than normal hepatocytes.

### Gallic acid induces TNF- $\alpha$ mediated programmed necrosis in aHSCs

The GA-induced cytotoxic effect on aHSCs was observed in dose-dependent manners ([Fig. 1A](#)). We then attempted to further reveal the molecular mechanisms by which GA mediated the death of aHSCs. Our cell cycle analysis showed that GA did not provoke significant apoptotic effects on aHSCs ([Fig. 4A](#), [S3 Fig.](#)). The sub G1 phase showed slight change after GA treatment (25, 50, and 75  $\mu M$ ). However, LDH release ( $P < 0.05$ ) appeared with the increase in GA concentrations (25, 50, and 75  $\mu M$ ) ([Fig. 4B](#)). This dose-dependent LDH release implies the disruption of the plasma membrane and subcellular organelles. Thus, GA might likely mediate a programmed necrotic effect, necroptosis, on aHSCs. It is known that TNF- $\alpha$  pathway has been suggested to be associated with necroptosis, and RIP1 is one of key factors of necroptosis. The TNF- $\alpha$  antagonist, SPD-304, and RIP1 inhibitor, Nec-1, were then used to examine GA-induced programmed necrotic cell death. The addition of SPD-304 and Nec-1 significantly rescued the survivability of aHSCs ([Fig. 4C](#)), reduced the production of lipid hydroxides ([Fig. 2E](#)), and increased intracellular GSH ([Fig. 2G](#)), indicating the involvement of necroptosis in GA-induced programmed cell death.

It is suggested that the activation of RIP3 and TRADD are critical elements of TNF signaling-mediated necroptosis [[32](#)]. As shown in [Fig. 4D](#), GA induced substantial TNF- $\alpha$  release from aHSCs, which could likely elicit the downstream activation of necroptosis. Additionally, RIP3, the trigger of necroptosis in the TNF- $\alpha$  pathway, along with the up-regulated expression of TRADD and the blocked caspase-8 activity, engages the effector mechanisms of necroptosis [[26](#)]. The results of immunoblotting analysis revealed that with the whole lysates of aHSCs, GA significantly up-regulated TRADD and p-RIP3 (1.4 and 1.3-fold, respectively) and down-regulated the activation of caspase-8 ([Fig. 4E](#)). The co-treatment of GA (75  $\mu M$ ) and SPD-304 (2  $\mu M$ ), as expected, down-regulated TRADD almost 2-fold (w/o inhibitor vs. w/ inhibitor, 1.41 vs. 0.73) and p-RIP3 1.4-fold (1.32 vs. 0.99) compared to GA alone ([Fig. 4E](#)), and

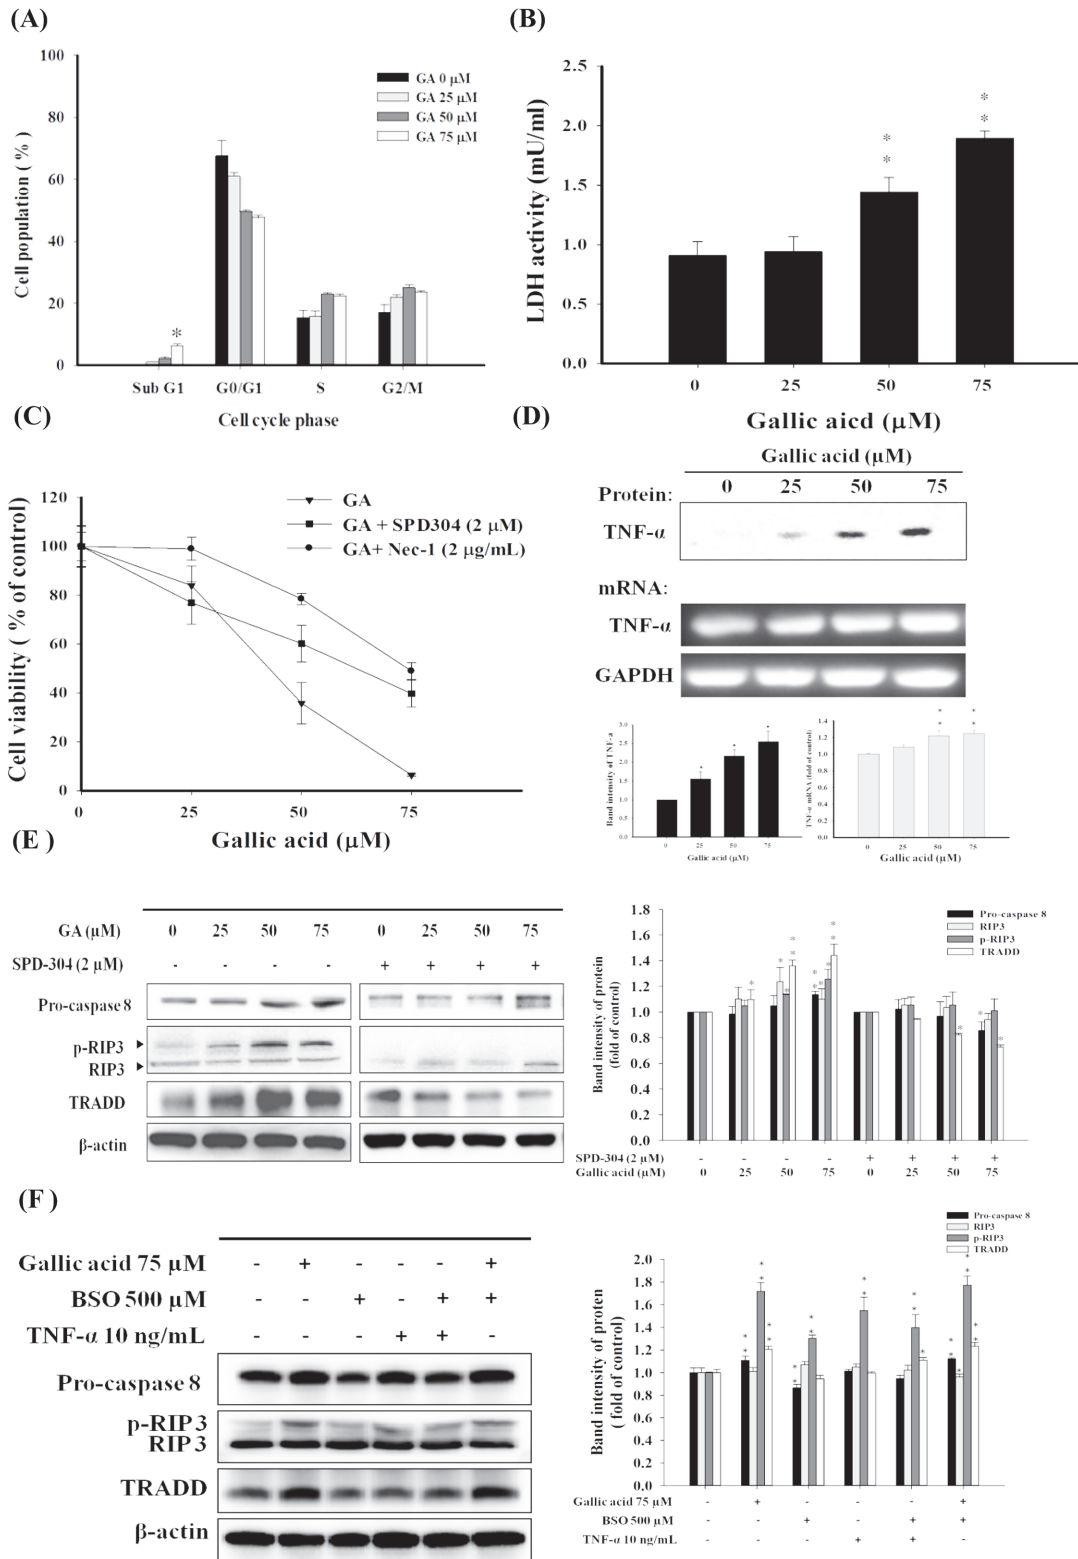

**Fig 4. GA induces TNF- $\alpha$  mediated necroptosis in aHSCs.** (A) GA induced low levels of sub-G1 population in aHSCs as analyzed by flow cytometry. (B) Plasma membrane integrity of aHSCs after GA treatment at designated concentrations was evaluated by LDH assay. (C) Involvement of TNF- $\alpha$  and RIP1 in GA-induced necroptosis. Increased cell viability of aHSCs was obtained through the co-incubation of GA at various concentrations and SPD304 (2 $\mu$ M) or Nec-1 (2 $\mu$ g/mL). (D) GA elicited substantial production of TNF- $\alpha$  as determined by immunoblotting and RT-PCR analysis. Immunoblotting analysis of

necroptosis-related factors at various GA concentrations (0, 25, 50, and 75  $\mu$ M) with or without (E) SPD-304, (F) BSO and TNF- $\alpha$ , co-incubation for 24hrs. Representative immunoblots showed the levels of TRADD, caspase-8, p-RIP3, and RIP3.  $\beta$ -actin was used as an internal control. \*  $P < 0.05$ , \*\*  $P < 0.01$ .

doi:10.1371/journal.pone.0120713.g004

promoted caspase 8 activation (1.14 vs. 0.8). These results indicate that GA induced a selective necroptosis in aHSCs by triggering TNF- $\alpha$  signaling pathway.

Based on these findings, GA could likely induce necroptosis partly through the actions of activation of TNF- $\alpha$  pathway, suppression of pro-caspase 8 activation, and depletion of intracellular GSH. Buthionine sulphoximine (BSO), an inhibitor of  $\gamma$ -glutamylcysteine synthetase ( $\gamma$ -GCS) to deplete intracellular GSH, was used in conjunction with TNF- $\alpha$  to investigate whether the factors associated with necroptosis could be provoked. As shown in [Fig. 4F](#), BSO alone could significantly elicit the phosphorylation of RIP3 but could not upregulate other factors associated with necroptosis, *e.g.* TRADD. On the other hand, the combinatory effects of BSO and TNF- $\alpha$  significantly promoted the activation of RIP3 and TRADD. These results might explain partly the necroptotic mechanisms that GA exerted on aHSCs.

### Gallic acid promotes increased intracellular calcium levels and calpain-1-modulated LMP in aHSCs

[Fig. 5A](#) indicated that the intracellular calcium level rose with the elevation of GA concentrations (25, 50, and 75  $\mu$ M) ( $P < 0.05$ ). The accumulation of calcium was suppressed by co-treatment with GA (75  $\mu$ M) and SPD-304 (GA alone vs. GA/SPD-304, 2.19 vs. 1.44 mg/dL, respectively). The addition of Nec-1 also suppressed GA-induced  $\text{Ca}^{2+}$  elevation (GA alone vs. GA/Nec-1, 2.19 vs. 1.25 mg/dL, respectively, at GA 75  $\mu$ M). These results indicate that GA-induced  $\text{Ca}^{2+}$  accumulation was through death receptor (DR)-elicited signaling. Molecules that associated with calcium-modulated necroptosis such as intracellular calcium concentration regulator, calmodulin (CaM), and calcium-activated neutral protease, calpain 1, were then examined. The active form of calpain executes lysosomal membrane permeabilization (LMP), which causes lysosome rupture and the spillage of acidic lysosomal contents to mediate cytoplasm acidification and degradation [33]. The results of the immunoblotting analysis indicate that GA remarkably up-regulated the expression of CaM and calpain 1, but the elevation was suppressed by the treatment of SPD-304 and Nec-1 ([Fig. 5B](#)), suggesting that GA triggers the process of necroptosis through the modulation of calcium signaling.

Next, calpain-induced lysosomal membrane permeabilization (LMP) during GA-induced necroptosis was investigated by lysosomal staining with acridine orange. As shown in [Fig. 5C](#), low level of orange fluorescence was observed in cells treated with GA alone, whereas increased orange fluorescence appeared upon the addition of SPD-304 and Nec-1, indicating the presence of intact acid organelle such as lysosome, after the treatment of inhibitors. These results indicate that either blocking TNF- $\alpha$  signalling or RIP1 remarkably arrested the process of GA-induced LMP, which rescued the subsequent cell viability ([Fig. 4B](#)). Collectively, our data demonstrated that GA-induced TNF- $\alpha$ -mediated necroptosis in aHSCs was elicited by triggering RIP1 and RIP3 necroptosome, followed by the modulation of  $\text{Ca}^{2+}$  signaling to execute LMP through calpain1 activation.

### Inhibition of RIP1 activities diverts GA-induced necroptosis to apoptosis

It has been reported that necroptosis is reciprocal to apoptosis when the apoptotic signaling is blocked [34]. Therefore, we attempted to study whether blocking the GA-induced signals of necroptosis could divert cell death toward apoptosis. Various concentrations of GA were concurrently added with Nec-1 to aHSCs. [Fig. 6](#) reveals that under apoptosis-competent

(A)

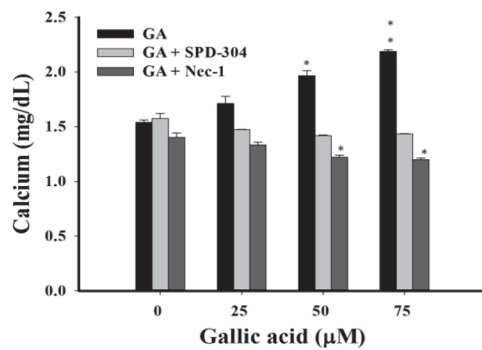

(B)

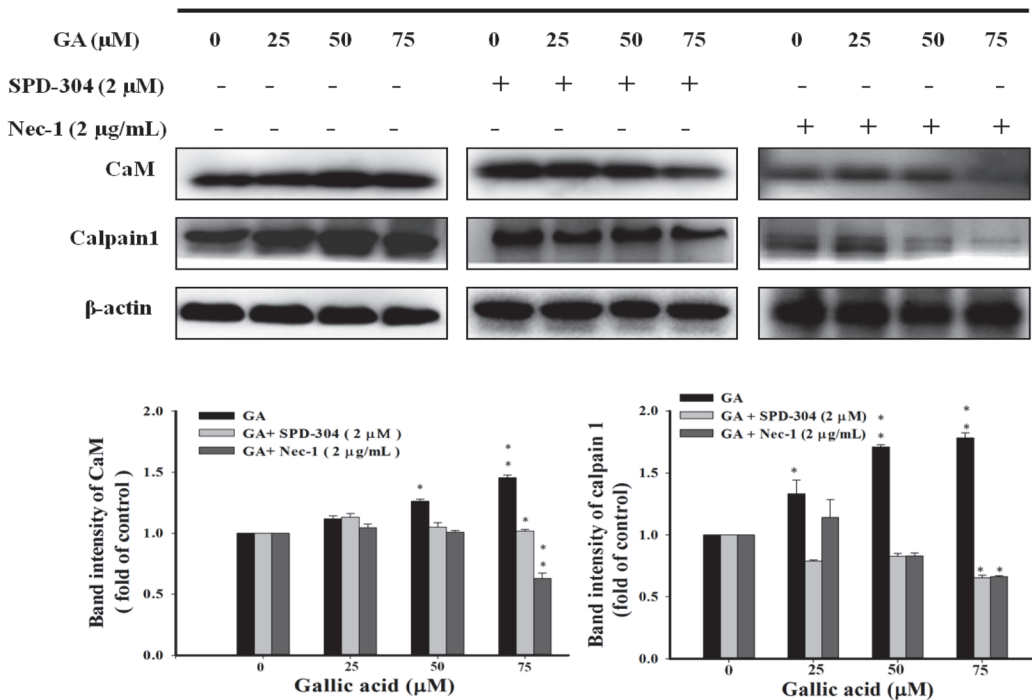

(C)

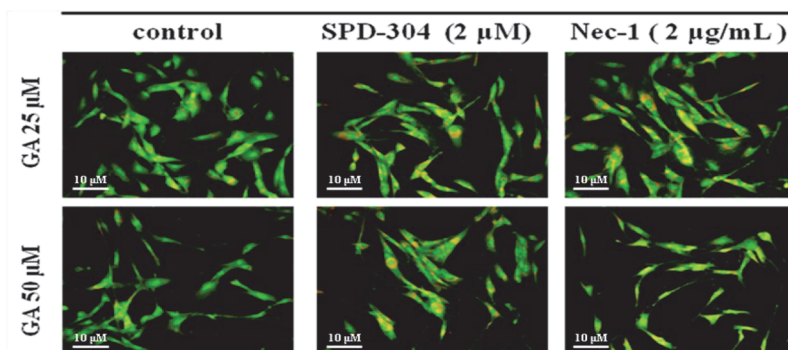

**Fig 5. GA-induced necroptosis is associated with Ca<sup>2+</sup> signaling and lysosomal membrane permeabilization in aHSCs.** (A) GA-induced calcium release was regulated by the TNF pathway. The cells were co-treated with GA (0, 25, 50, and 75 µM), and SPD-304 (2 µM) or Nec-1 (2 µg/mL) for 24 hrs, followed by the analysis of cytosolic calcium contents. The results represent the means±SD from three independent experiments. (B) Elevated cytosolic calcium levels triggered by GA upregulated the expression of CaM and calpain 1. The activated HSCs were treated with various concentrations of GA (0, 25,

50, and 75  $\mu\text{M}$ ) with or without SPD-304 (2  $\mu\text{M}$ ) or Nec-1 (2  $\mu\text{g}/\text{mL}$ ) for 24 hrs. Representative immunoblots showed the expression of CaM and calpain 1.  $\beta$ -actin was used as an internal control. \*  $P < 0.05$ , \*\*  $P < 0.01$ . (C) GA induces lysosomal membrane permeabilization in aHSCs. The effects of GA on lysosomal stability. The activated HSCs were treated with GA (25 and 50  $\mu\text{M}$ ) and with or without SPD-304 (2  $\mu\text{M}$ ) or Nec-1 (2  $\mu\text{g}/\text{mL}$ ) for 24 hrs. The activated HSCs were stained with aridine orange to determine the integrity of the lysosomes. (Scale bars, 10  $\mu\text{m}$ ).

doi:10.1371/journal.pone.0120713.g005

condition (with Nec-1), GA (25 and 50  $\mu\text{M}$ ) significantly activated caspase 3 and released cytochrome c to the cytoplasm. On the other hand, under apoptosis-deficient condition (without Nec-1), no significant activation of caspase 3 and cytochrome c was observed. Based on these results, the activity of RIP1 was required in GA-triggered aHSC necroptosis. In addition, the diversion of GA-triggered necroptosis to apoptosis verified the reciprocal relationship of these two cell death processes to ensure cell termination under stimuli conditions [34].

## Discussion

In the present study, we aimed to investigate the molecular mechanisms of programmed cell death that GA exerted in active hepatic stellate cells, a key factor associated with hepatic fibrosis. We revealed that GA promoted necroptotic cell death through the induction of TNF- $\alpha$ -mediated necroptosis. GA induced significant oxidative stress as observed by the depletion of intracellular GSH, the formation of intracellular aldehyde (e.g., malondialdehyde, MDA) and hydrogen peroxide, as well as ROS accumulation, which led to subsequent cytotoxicity. It is intriguing that the GA esters, methyl 3,4,5-trihydroxy-benzoate (M) ( $-\text{COOCH}_3$  at  $\text{C}_1$ ) and propyl 3,4,5-trihydroxy-benzoate (PG) ( $-\text{COO}(\text{CH}_2)_2\text{CH}_3$  at  $\text{C}_1$ ), showed much lower levels of ROS formation and cytotoxicity than those of GA ( $-\text{COOH}$  at  $\text{C}_1$ ), pyrogallol (P) ( $-\text{H}_2$  at  $\text{C}_1$ ), and 5-Hydroxydopamine hydrochloride (H) ( $-\text{C}_2\text{H}_4\text{NH}_2$  at  $\text{C}_1$ ). Presumably GA, P, and H are in more resonance forms than M and PG leading to higher levels of ROS formation and cytotoxicity resulted.

GA-induced oxidative damage and cytotoxic effects were low in hepatic cells but were high in aHSCs, which could be attributed to the activity of antioxidative systems, such as catalase, a critical regulator of intracellular ROS levels. Hepatocytes hold potent catalase activity and can eliminate GA-induced oxidative stress displaying enhanced cell survivability. Suppressed catalase activity has been addressed in hepatoma cells and activated HSCs [31,35]. Mechanisms involved in decreasing catalase activity have been reported in hepatoma cells due to the genomic methylation of CpG sites in the catalase promoter [21,35], which might also apply to aHSCs during transformation.

Our results indicated that GA significantly promoted the secretion of TNF- $\alpha$  and the production of RIP1, reduced intracellular GSH levels, and inhibited the activation of caspase-8 in aHSCs. These observations may suggest the involvement of necroptosis. Moreover, GA also induced several cellular events such as intracellular  $\text{Ca}^{2+}$  influx, lipid peroxidation, and lysosomal disruption (LMP) by  $\text{Ca}^{2+}$  influx activated calpains [36], which are all typical characteristics of necroptosis. Inactive form of caspase-8 integrated with RIP3 leads to the subsequent mobilization of calpain and the promotion of LMP, causing the loss of organelle and cell integrity, and finally leading to necroptosis. These phenomena summarized in Fig. 7 indicate the processing of necroptosis in GA treated aHSCs.

The reduction of intracellular GSH levels caused by GA-induced oxidative stress could be essential to the diversion of programmed cell death from apoptosis, which is reportedly occurred in several GA-induced cell deaths, to necroptosis. Reduced levels of GSH have been seen to repress the undergoing of apoptosis. Direct depletion of GSH under pro-oxidative condition has been indicated to prevent CD95—and TNFR1-mediated hepatocyte apoptosis *in vivo* [37]. The oxidized GSH, GSSG, is also shown to blockade apoptosome-mediated caspase-



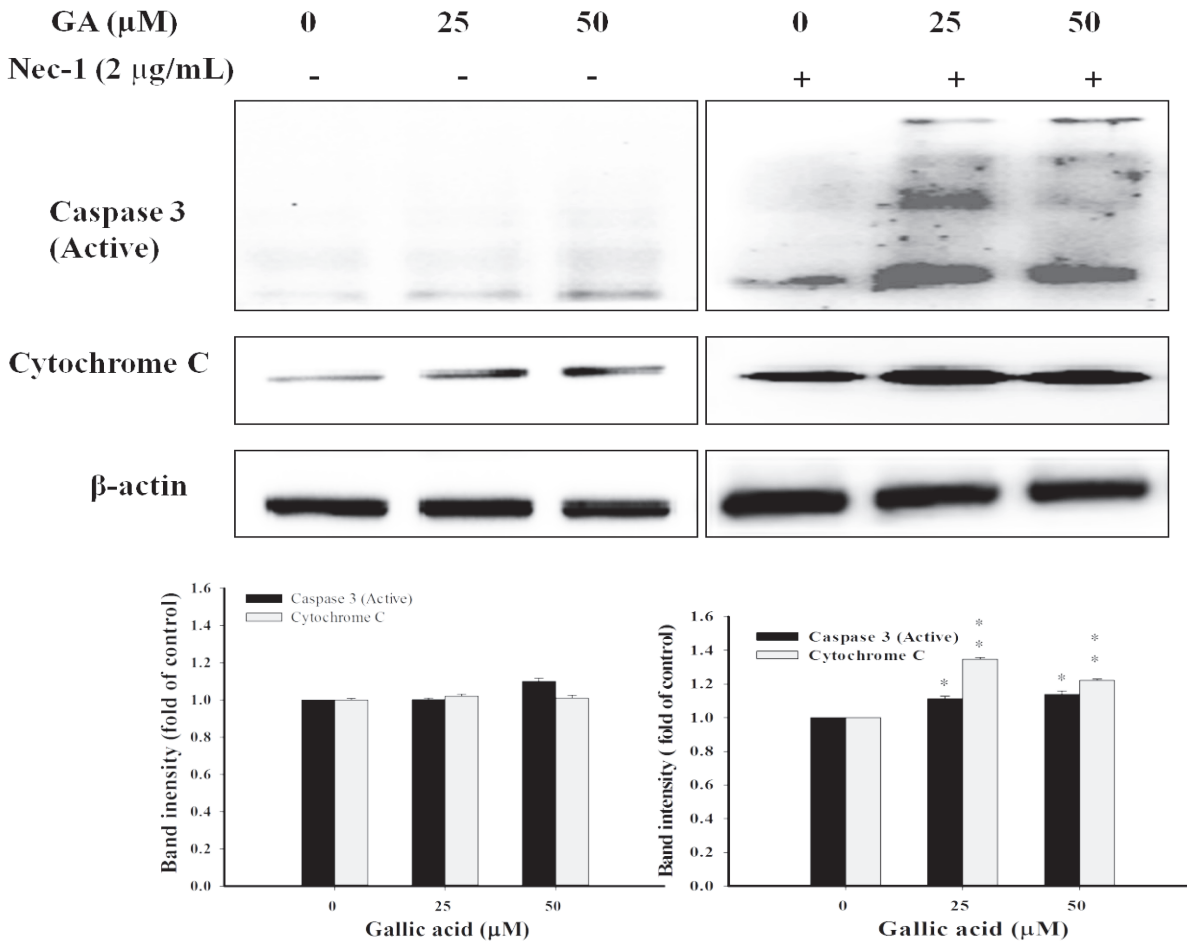

**Fig 6. Inhibition of RIP1 diverts GA-induced necroptosis to apoptosis.** Dose-dependent activation of caspase-3 and cytochrome c in aHSCs co-treated with GA and Nec-1. The cells were treated with GA (0, 25, and 50 μM) for 24 hrs in the presence of Nec-1 (2 μg/mL), followed by the analysis of apoptosis-related protein expression by immunoblotting. Representative immunoblots showed the levels of active caspase-3 and cytochrome c. β-actin was used as an internal control. \*  $P < 0.05$ , \*\*  $P < 0.01$ .

doi:10.1371/journal.pone.0120713.g006

3 activation [37]. Further, the activation of caspase such as caspase-8 is suggested under a reducing environment. This caspase requires antioxidants at death-inducing signaling complex (DISC) for activation [37]. Therefore, the accumulation of intracellular hydrogen peroxide and the depletion of GSH induced by GA could likely impair the activation of caspase-3 and 8, leading to necroptosis in aHSCs.

The reciprocal backup relationship of apoptosis and necroptosis has been addressed [34] to ensure cell termination under stimuli conditions. Inactivation of RIP1 by Nec-1 diverts GA-triggered necroptosis to apoptosis as evidenced by the increased level of cytochrome c and the activation of caspase-3. RIP1 plays several roles in the promotion of necroptosis. RIP1 is not only an element of necrosome, but also a mediator in phosphorylating an anti-apoptotic factor, STAT3, at Ser727, which enables the activated molecule to interact with GRIM-19 resulting in the subsequent translocation to mitochondria [38]. This leads to an apoptosis-deficient situation, and provokes TNF-induced necroptosis. RIP1 has been seen to mediate caspase inhibitor-induced TNF-α production [39], and TNF-induced ROS generation [40] to regulate the progression of necroptosis. Thus, the inhibition of RIP1 by Nec-1 would restrict the undergoing of necroptosis. On the other hand, Nec-1, not an antioxidant, is reported to be able to

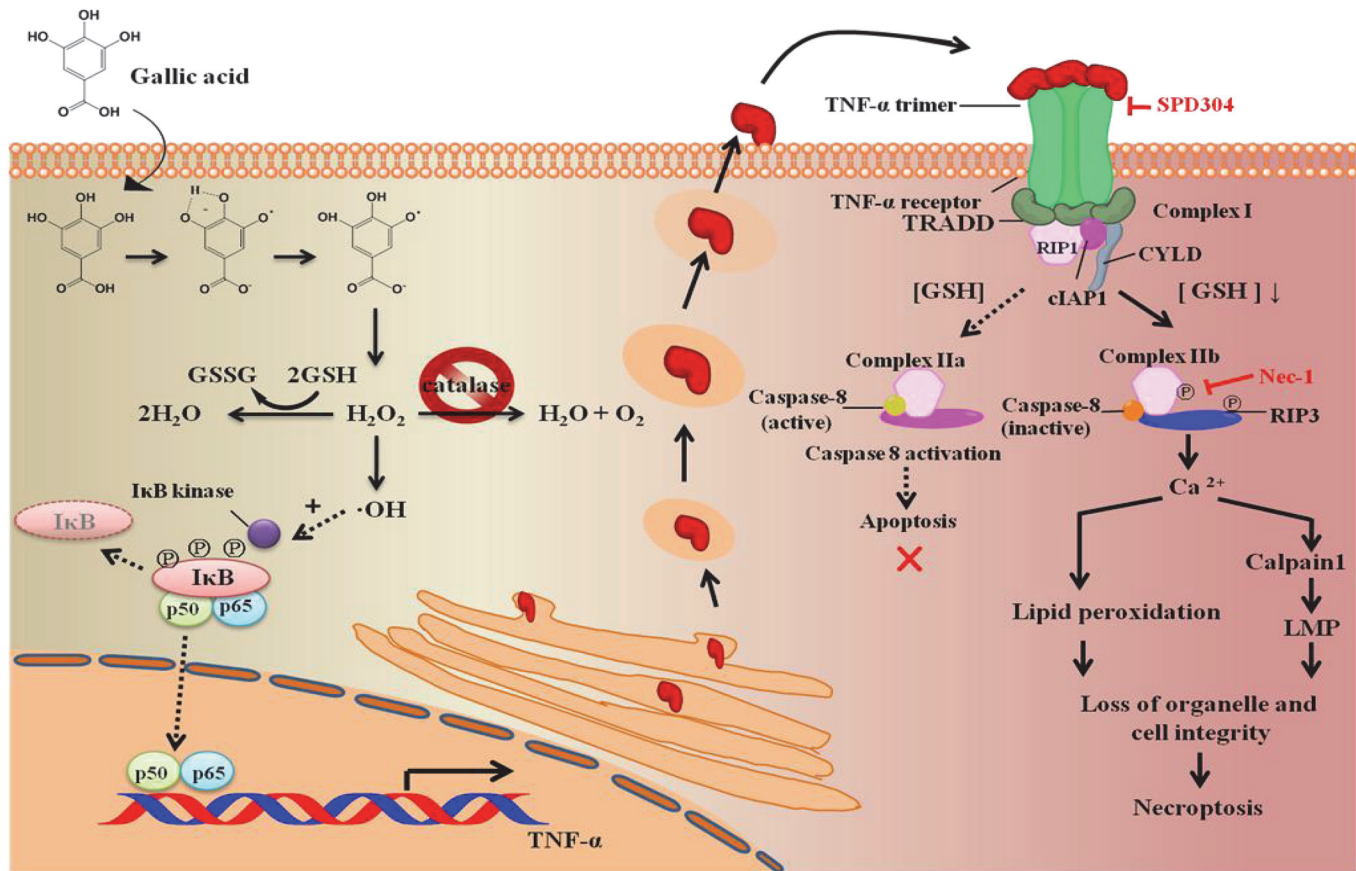

**Fig 7. Schematic illustration of the signaling pathway of GA-induced necroptosis.** GA induced the bioactivities of aHSCs in several ways: GA 1) depletes GSH and 2) suppresses catalase activity, and 3) promoted the expression of TNF- $\alpha$  and the formation of TNFR1-elicited necrosome complexes, resulting in the accumulation of  $Ca^{2+}$  and activation of calpain 1 to attack the lysosomes, leading to necroptosis.

doi:10.1371/journal.pone.0120713.g007

resume intracellular reducing environment due to the suppressive ability in GSH depletion and ROS formation [41]. Accordingly, in addition to be a RIP1 inhibitor, Nec-1 may exercise its “antioxidative” character to halt necroptosis, which usually dysregulate cellular redox metabolome through the depletion of  $NAD^+$ ,  $NADPH$ , and GSH [42].

## Conclusion

GA-induced apoptosis has been reported elsewhere, however, GA elicits necroptosis in aHSCs was first reported herein. GA elicits TNF signaling pathway that promotes necroptosis in aHSCs. The oxidative stress induced by GA may trigger the production of TNF- $\alpha$ , which evokes the downstream signaling of necroptosis, including the formation of necrosome (activation of RIP1, RIP3, and inactivation of caspase-8) and the subsequent events such as intracellular  $Ca^{2+}$  influx, lipid peroxidation, and lysosomal disruption (LMP) by  $Ca^{2+}$  influx activated calpains. This is the first report that indicates GA-induced necroptosis in aHSCs, which may provide an alternative strategy for the amelioration of liver fibrosis, in addition to the anti-oxidative activity of this phenolic compound. The intermittent molecules of TNF- $\alpha$  signaling pathway responsible for TNF- $\alpha$ -mediated necroptosis have not yet been clearly asserted. The examination of GA-induced cell death signals that propagate further will be focused on the

investigation of cellular redox metabolome signaling associated with other modes of regulated necrosis.

## Supporting Information

**S1 Fig. Molecular structures of GA and its analogues.** 3,4,5-trihydroxybenzoic acid (gallic acid, GA), 3,4-Dihydroxybenzoic acid (Protocatechuic acid, PA), 3,5-Dihydroxybenzoic acid ( $\alpha$ -resorcylic acid, RA), 3-Hydroxy-4-methylbenzoic acid (3,4-cresotic acid, CA), Pyrogallol (P), Methyl 3,4,5-trihydroxy-benzoate (M), Propyl 3,4,5-trihydroxy-benzoate (PG), 4-Nitrocatechol (N), 5-Hydroxydopamine hydrochloride (H). (TIF)

**S2 Fig. The cytotoxic effects of GA on qHSCs.** Various concentrations of GA (0, 25, 50, and 75  $\mu$ M) were added to qHSCs. The cell viability was measured by an MTT assay. Data were expressed as mean $\pm$ SD from three different experiments. The asterisk (\*) indicates a significant difference from control group (\*  $P < 0.05$ , \*\*  $P < 0.01$ ). (TIF)

**S3 Fig. GA induces low levels of sub-G1 population in aHSCs.** Activated HSCs were cultured in serum free medium with GA (0, 25, 50, 75  $\mu$ M) for 24 h, followed by flow cytometric analysis with ethanol (70%) fixation and propidium iodide (PI) labeling. (TIF)

## Acknowledgments

This study was supported by the grants from the TCVGH-NCNU1027902, NSC 101-2627-M-260-001, NSC 101-2113-M-260-002-MY2, and TCVGH-NCNU-1017901.

## Author Contributions

Conceived and designed the experiments: LCW JAH SLH. Performed the experiments: YJC YTL YHL MHL SJH. Analyzed the data: YJC YTL YHL MHL LCW. Contributed reagents/materials/analysis tools: LCW JAH SLH. Wrote the paper: LCW JAH.

## References

1. Hynes MJ, Coinceanainn MO The kinetics and mechanisms of the reaction of iron(III) with gallic acid, gallic acid methyl ester and catechin. *J Inorg Biochem.* 2001; 85: 131–142. PMID: [11410233](#)
2. Bors W, Michel C, Stettmaier K Electron paramagnetic resonance studies of radical species of proanthocyanidins and gallate esters. *Arch Biochem Biophys.* 2000; 374: 347–355. PMID: [10666317](#)
3. You BR, Kim SZ, Kim SH, Park WH Gallic acid-induced lung cancer cell death is accompanied by ROS increase and glutathione depletion. *Mol Cell Biochem.* 2011; 357: 295–303. doi: [10.1007/s11010-011-0900-8](#) PMID: [21625953](#)
4. Russell LH Jr., Mazzio E, Badisa RB, Zhu ZP, Agharahimi M, Oriaku ET, et al. Autoxidation of gallic acid induces ROS-dependent death in human prostate cancer LNCaP cells. *Anticancer Res.* 2012; 32: 1595–1602. PMID: [22593437](#)
5. You BR, Park WH Gallic acid-induced human pulmonary fibroblast cell death is accompanied by increases in ROS level and GSH depletion. *Drug Chem Toxicol.* 2011; 34: 38–44. doi: [10.3109/01480545.2010.494182](#) PMID: [20954801](#)
6. Lee KW, Hur HJ, Lee HJ, Lee CY Antiproliferative effects of dietary phenolic substances and hydrogen peroxide. *J Agric Food Chem.* 2005; 53: 1990–1995. PMID: [15769125](#)
7. Ohno Y, Fukuda K, Takemura G, Toyota M, Watanabe M, Yasuda N, et al. Induction of apoptosis by gallic acid in lung cancer cells. *Anticancer Drugs.* 1999; 10: 845–851. PMID: [10587295](#)

8. Yanez J, Vicente V, Alcaraz M, Castillo J, Benavente-Garcia O, Canteras M, et al. Cytotoxicity and anti-proliferative activities of several phenolic compounds against three melanocytes cell lines: relationship between structure and activity. *Nutr Cancer*. 2004; 49: 191–199. PMID: [15489212](#)
9. Nabavi SM, Habtemariam S, Nabavi SF, Sureda A, Daglia M, Moghaddam AH, et al. Protective effect of gallic acid isolated from *Peltiphylllum peltatum* against sodium fluoride-induced oxidative stress in rat's kidney. *Mol Cell Biochem*. 2013; 372: 233–239. doi: [10.1007/s11010-012-1464-y](#) PMID: [23014933](#)
10. Chia YC, Rajbanshi R, Calhoun C, Chiu RH. Anti-neoplastic effects of gallic acid, a major component of *Toona sinensis* leaf extract, on oral squamous carcinoma cells. *Molecules*. 2010; 15: 8377–8389. doi: [10.3390/molecules15118377](#) PMID: [21081858](#)
11. Qiu X, Takemura G, Koshiji M, Hayakawa Y, Kanoh M, Maruyama R, et al. Gallic acid induces vascular smooth muscle cell death via hydroxyl radical production. *Heart Vessels*. 2000; 15: 90–99. PMID: [11199510](#)
12. Chuang CY, Liu HC, Wu LC, Chen CY, Chang JT, Hsu SL. Gallic acid induces apoptosis of lung fibroblasts via a reactive oxygen species-dependent ataxia telangiectasia mutated-p53 activation pathway. *J Agric Food Chem*. 2010; 58: 2943–2951. doi: [10.1021/jf9043265](#) PMID: [20151649](#)
13. Inoue M, Suzuki R, Koide T, Sakaguchi N, Ogihara Y, Yabu Y. Antioxidant, gallic acid, induces apoptosis in HL-60RG cells. *Biochem Biophys Res Commun*. 1994; 204: 898–904. PMID: [7980558](#)
14. Rasool MK, Sabina EP, Ramya SR, Preeti P, Patel S, Mandal N, et al. Hepatoprotective and antioxidant effects of gallic acid in paracetamol-induced liver damage in mice. *J Pharm Pharmacol*. 2010; 62: 638–643. doi: [10.1211/jpp/62.05.0012](#) PMID: [20609067](#)
15. Traister A, Breitman I, Bar-Lev E, Zvibel I, Harel A, Halpern Z, et al. Nicotinamide induces apoptosis and reduces collagen I and pro-inflammatory cytokines expression in rat hepatic stellate cells. *Scand J Gastroenterol*. 2005; 40: 1226–1234. PMID: [16165703](#)
16. Li D, Friedman SL. Liver fibrogenesis and the role of hepatic stellate cells: new insights and prospects for therapy. *J Gastroenterol Hepatol*. 1999; 14: 618–633. PMID: [10440206](#)
17. Moreira RK. Hepatic stellate cells and liver fibrosis. *Arch Pathol Lab Med*. 2007; 131: 1728–1734. PMID: [17979495](#)
18. Sanchez-Valle V, Chavez-Tapia NC, Uribe M, Mendez-Sanchez N. Role of oxidative stress and molecular changes in liver fibrosis: a review. *Curr Med Chem*. 2012; 19: 4850–4860. PMID: [22709007](#)
19. Reeves HL, Friedman SL. Activation of hepatic stellate cells—a key issue in liver fibrosis. *Front Biosci*. 2002; 7: d808–826. PMID: [11897564](#)
20. Marra M, Sordelli IM, Lombardi A, Lamberti M, Tarantino L, Giudice A, et al. Molecular targets and oxidative stress biomarkers in hepatocellular carcinoma: an overview. *J Transl Med*. 2011; 9: 171. doi: [10.1186/1479-5876-9-171](#) PMID: [21985599](#)
21. Quan X, Lim SO, Jung G. Reactive oxygen species downregulate catalase expression via methylation of a CpG island in the Oct-1 promoter. *FEBS Lett*. 2011; 585: 3436–3441. doi: [10.1016/j.febslet.2011.09.035](#) PMID: [21985966](#)
22. Sato K, Ito K, Kohara H, Yamaguchi Y, Adachi K, Endo H. Negative regulation of catalase gene expression in hepatoma cells. *Mol Cell Biol*. 1992; 12: 2525–2533. PMID: [1588955](#)
23. Takeuchi T, Nakamura S, Kayasuga A, Isa S, Sato K. Multiple elements for negative regulation of the rat catalase gene expression in dedifferentiated hepatoma cells. *J Biochem*. 2000; 128: 1025–1031. PMID: [11098146](#)
24. Inoue M, Sakaguchi N, Isuzugawa K, Tani H, Ogihara Y. Role of reactive oxygen species in gallic acid-induced apoptosis. *Biol Pharm Bull*. 2000; 23: 1153–1157. PMID: [11041242](#)
25. Hitomi J, Christofferson DE, Ng A, Yao J, Degterev A, Xavier RJ, et al. Identification of a molecular signaling network that regulates a cellular necrotic cell death pathway. *Cell*. 2008; 135: 1311–1323. doi: [10.1016/j.cell.2008.10.044](#) PMID: [19109899](#)
26. Vanden Berghe T, Linkermann A, Jouan-Lanhouet S, Walczak H, Vandenabeele P. Regulated necrosis: the expanding network of non-apoptotic cell death pathways. *Nat Rev Mol Cell Biol*. 2014; 15: 135–147. doi: [10.1038/nrm3737](#) PMID: [24452471](#)
27. Vanlangenakker N, Vanden Berghe T, Vandenabeele P. Many stimuli pull the necrotic trigger, an overview. *Cell Death Differ*. 2012; 19: 75–86. doi: [10.1038/cdd.2011.164](#) PMID: [22075985](#)
28. Seglen PO. Preparation of isolated rat liver cells. *Methods Cell Biol*. 1976; 13: 29–83. PMID: [177845](#)
29. Kawada N, Seki S, Inoue M, Kuroki T. Effect of antioxidants, resveratrol, quercetin, and N-acetylcysteine, on the functions of cultured rat hepatic stellate cells and Kupffer cells. *Hepatology*. 1998; 27: 1265–1274. PMID: [9581680](#)

30. Pourahmad J, Eskandari MR, Kaghazi A, Shaki F, Shahraki J, Fard JK A new approach on valproic acid induced hepatotoxicity: involvement of lysosomal membrane leakiness and cellular proteolysis. *Toxicol In Vitro*. 2012; 26: 545–551. doi: [10.1016/j.tiv.2012.01.020](https://doi.org/10.1016/j.tiv.2012.01.020) PMID: [22342442](https://pubmed.ncbi.nlm.nih.gov/22342442/)
31. Guimaraes EL, Franceschi MF, Grivicich I, Dal-Pizzol F, Moreira JC, Guaragna RM, et al. Relationship between oxidative stress levels and activation state on a hepatic stellate cell line. *Liver Int*. 2006; 26: 477–485. PMID: [16629652](https://pubmed.ncbi.nlm.nih.gov/16629652/)
32. Moujalled DM, Cook WD, Okamoto T, Murphy J, Lawlor KE, Vince JE, et al. TNF can activate RIPK3 and cause programmed necrosis in the absence of RIPK1. *Cell Death Dis*. 2013; 4: e465. doi: [10.1038/cddis.2012.201](https://doi.org/10.1038/cddis.2012.201) PMID: [23328672](https://pubmed.ncbi.nlm.nih.gov/23328672/)
33. Boya P, Kroemer G Lysosomal membrane permeabilization in cell death. *Oncogene*. 2008; 27: 6434–6451. doi: [10.1038/onc.2008.310](https://doi.org/10.1038/onc.2008.310) PMID: [18955971](https://pubmed.ncbi.nlm.nih.gov/18955971/)
34. Han W, Xie J, Li L, Liu Z, Hu X Necrostatin-1 reverts shikonin-induced necroptosis to apoptosis. *Apoptosis*. 2009; 14: 674–686. doi: [10.1007/s10495-009-0334-x](https://doi.org/10.1007/s10495-009-0334-x) PMID: [19288276](https://pubmed.ncbi.nlm.nih.gov/19288276/)
35. Min JY, Lim SO, Jung G Downregulation of catalase by reactive oxygen species via hypermethylation of CpG island II on the catalase promoter. *FEBS Lett*. 2010; 584: 2427–2432. doi: [10.1016/j.febslet.2010.04.048](https://doi.org/10.1016/j.febslet.2010.04.048) PMID: [20416298](https://pubmed.ncbi.nlm.nih.gov/20416298/)
36. Kennedy CL, Smith DJ, Lyras D, Chakravorty A, Rood JI Programmed cellular necrosis mediated by the pore-forming alpha-toxin from *Clostridium septicum*. *PLoS Pathog*. 2009; 5: e1000516. doi: [10.1371/journal.ppat.1000516](https://doi.org/10.1371/journal.ppat.1000516) PMID: [19609357](https://pubmed.ncbi.nlm.nih.gov/19609357/)
37. Hentze H, Schmitz I, Latta M, Krueger A, Krammer PH, Wendel A Glutathione dependence of caspase-8 activation at the death-inducing signaling complex. *J Biol Chem*. 2002; 277: 5588–5595. PMID: [11734564](https://pubmed.ncbi.nlm.nih.gov/11734564/)
38. Shulga N, Pastorino JG GRIM-19-mediated translocation of STAT3 to mitochondria is necessary for TNF-induced necroptosis. *J Cell Sci*. 2012; 125: 2995–3003. doi: [10.1242/jcs.103093](https://doi.org/10.1242/jcs.103093) PMID: [22393233](https://pubmed.ncbi.nlm.nih.gov/22393233/)
39. Christofferson DE, Li Y, Hitomi J, Zhou W, Upperman C, Zhu H, et al. A novel role for RIP1 kinase in mediating TNFalpha production. *Cell Death Dis*. 2012; 3: e320. doi: [10.1038/cddis.2012.64](https://doi.org/10.1038/cddis.2012.64) PMID: [22695613](https://pubmed.ncbi.nlm.nih.gov/22695613/)
40. Georgiadis V, Knight RA Necroptosis: STAT3 kills? *JAKSTAT*. 2012; 1: 200–202. doi: [10.4161/jkst.20968](https://doi.org/10.4161/jkst.20968) PMID: [24058772](https://pubmed.ncbi.nlm.nih.gov/24058772/)
41. Zhang YF, He W, Zhang C, Liu XJ, Lu Y, Wang H, et al. Role of receptor interacting protein (RIP)1 on apoptosis-inducing factor-mediated necroptosis during acetaminophen-evoked acute liver failure in mice. *Toxicol Lett*. 2014; 225: 445–453. doi: [10.1016/j.toxlet.2014.01.005](https://doi.org/10.1016/j.toxlet.2014.01.005) PMID: [24440347](https://pubmed.ncbi.nlm.nih.gov/24440347/)
42. Narayan N, Lee IH, Borenstein R, Sun J, Wong R, Tong G, et al. The NAD-dependent deacetylase SIRT2 is required for programmed necrosis. *Nature*. 2012; 492: 199–204. doi: [10.1038/nature11700](https://doi.org/10.1038/nature11700) PMID: [23201684](https://pubmed.ncbi.nlm.nih.gov/23201684/)
